# Supplementary material
Source: ML conference proceedings conference paper supplement (https://openreview.net/forum?id=IM8zOC94HF)
Supplement: supplementary_material [file attachment]

## 456 A Proofs

### 457 A.1 Proof for Proposition 1

458 For each  $k$ , we denote the stationary point of gradient descent as  $x_k^* = \lim_{n \rightarrow \infty} x_k^n$ . Using the  
 459 first-order optimality condition at the stationary point, we know that

$$\begin{aligned}
 0 &= \nabla_x d_{\sigma_k}(x; \mathcal{D})^2 \Big|_{x=x_k^*} \\
 &= -\nabla_x \sigma_k^2 \log \left[ \sum_i \exp \left[ -\frac{1}{2\sigma_k^2} \|x - x_i\|^2 \right] \right] \Big|_{x=x_k^*} \\
 &= \frac{\sigma_k^2 \sum_i \exp \left[ -\frac{1}{2\sigma_k^2} \|x - x_i\|^2 \right] \sigma_k^{-2} (x - x_i)}{\sum_i \exp \left[ -\frac{1}{2\sigma_k^2} \|x - x_i\|^2 \right]} \Big|_{x=x_k^*}.
 \end{aligned} \tag{13}$$

460 We then have that

$$\begin{aligned}
 \sum_i \exp \left[ -\frac{1}{2\sigma_k^2} \|x_k^* - x_i\|^2 \right] (x_k^* - x_i) &= 0 \\
 \left( \sum_i \exp \left[ -\frac{1}{2\sigma_k^2} \|x_k^* - x_i\|^2 \right] \right) x_k^* &= \sum_i \exp \left[ -\frac{1}{2\sigma_k^2} \|x_k^* - x_i\|^2 \right] x_i \\
 x_k^* &= \sum_i \frac{\exp \left[ -\frac{1}{2\sigma_k^2} \|x_k^* - x_i\|^2 \right]}{\sum_n \exp \left[ -\frac{1}{2\sigma_k^2} \|x_k^* - x_n\|^2 \right]} x_i.
 \end{aligned} \tag{14}$$

461 Let  $x_j \in \operatorname{argmin}_{x_i \in \mathcal{D}} \|x_k^* - x_i\|^2$  and  $\Delta_i(\sigma_k) = \sigma_k^{-2} (\|x_k^* - x_i\|^2 - \|x_k^* - x_j\|^2)$ .

462 **Lemma 4.** When there is a unique minimizer  $x_j$ ,  $\lim_{k \rightarrow \infty} x_k^* = x_j$ .

463 *Proof.* Since  $x_j$  is the unique closest data point to  $x_k^*$ ,  $\Delta_i > 0$  for  $i \neq j$  and  $\Delta_j = 0$ . With the  
 464 monotonically decreasing  $\sigma_k \rightarrow 0$ , we know that

$$\lim_{k \rightarrow \infty} \Delta_i(\sigma_k) = \begin{cases} 0 & \text{if } i = j \\ \infty & \text{otherwise.} \end{cases} \tag{15}$$

465 Therefore,

$$\lim_{k \rightarrow \infty} \exp \left[ -\frac{1}{2} \Delta_i(\sigma_k) \right] = \begin{cases} 1 & \text{if } i = j \\ 0 & \text{otherwise.} \end{cases} \tag{16}$$

466 We then obtain

$$\begin{aligned}
 \lim_{k \rightarrow \infty} \frac{\exp \left[ -\frac{1}{2\sigma_k^2} (\|x_k^* - x_i\|^2 - \|x_k^* - x_j\|^2) \right]}{\sum_n \exp \left[ -\frac{1}{2\sigma_k^2} (\|x_k^* - x_n\|^2 - \|x_k^* - x_j\|^2) \right]} &= \lim_{k \rightarrow \infty} \frac{\exp \left[ -\frac{1}{2} \Delta_i(\sigma_k) \right]}{\sum_{n \neq j} \exp \left[ -\frac{1}{2} \Delta_n(\sigma_k) \right] + 1} \\
 &= \begin{cases} 1 & \text{if } i = j \\ 0 & \text{otherwise.} \end{cases}
 \end{aligned} \tag{17}$$

467 Therefore, by combining (14) and (17), we have that

$$\lim_{k \rightarrow \infty} x_k^* = x_j. \tag{18}$$

468 □

469 **Lemma 5.** When there are multiple minimizers  $x_{j_1}, \dots, x_{j_m} \in \operatorname{argmin}_{x_i \in \mathcal{D}} \|x_k^* - x_i\|^2$ ,  
 470  $\lim_{k \rightarrow \infty} x_k^* = \frac{1}{m} \sum_{l=1}^m x_{j_l}$ .

471 *Proof.* In contrast to (17) for the unique  $x_j$ , we have that

$$\begin{aligned}
& \lim_{k \rightarrow \infty} \frac{\exp \left[ -\frac{1}{2} (\|x_k^* - x_i\|^2 - \|x_k^* - x_{j_1}\|^2) \right]}{\sum_n \exp \left[ -\frac{1}{2} (\|x_k^* - x_n\|^2 - \|x_k^* - x_{j_1}\|^2) \right]} \\
&= \lim_{k \rightarrow \infty} \frac{\exp \left[ -\frac{1}{2} \Delta_i(\sigma_k) \right]}{\sum_{n \notin \{j_1, \dots, j_m\}} \exp \left[ -\frac{1}{2} \Delta_n(\sigma_k) \right] + m} \\
&= \begin{cases} \frac{1}{m} & \text{if } i \in \{j_1, \dots, j_m\} \\ 0 & \text{otherwise.} \end{cases}
\end{aligned} \tag{19}$$

472 Therefore,  $x_k^*$  converges to the geometric center of all the minimizers:

$$\lim_{k \rightarrow \infty} x_k^* = \frac{1}{m} \sum_{l=1}^m x_{j_l}. \tag{20}$$

473

□

474 **Lemma 6.** For a local minimizer  $x_k^*$ ,  $x_j$  is unique; for a local maximizer or saddle point  $x_k^*$ ,  $x_j$  is  
475 not unique.

476 *Proof.* We first prove that  $x_j$  is unique if  $x_k^*$  is a local minimizer by contradiction. If there are  
477 multiple minimizers  $x_{j_1}, \dots, x_{j_m} \in \arg\min_{x_i \in \mathcal{D}} \|x_k^* - x_i\|^2$ , we have that

$$\begin{aligned}
\lim_{k \rightarrow \infty} d_{\sigma_k}(x_k^*; \mathcal{D})^2 &= \lim_{k \rightarrow \infty} -\sigma_k^2 \log \left[ \sum_i \exp \left[ -\frac{1}{2\sigma_k^2} \|x_k^* - x_i\|^2 \right] \right] \\
&= -\log \left[ \lim_{k \rightarrow \infty} \left( \sum_i \exp \left[ -\frac{1}{2\sigma_k^2} \|x_k^* - x_i\|^2 \right] \right)^{\sigma_k^2} \right] \\
&= \min_i \lim_{k \rightarrow \infty} \|x_k^* - x_i\|^2 \\
&= \lim_{k \rightarrow \infty} \|x_k^* - x_{j_1}\|^2 \\
&= \left\| \frac{1}{m} \sum_{l=1}^m x_{j_l} - x_{j_1} \right\|^2.
\end{aligned} \tag{21}$$

478 We observe that  $x_k^*$  is a local maximizer of  $\min_x d_{\sigma_k}(x; \mathcal{D})^2$ , which raises contradiction.

479 Similarly, we prove that  $x_j$  is not unique if  $x_k^*$  is a local maximizer or saddle point by contradiction.

480 Assume  $x_j$  is the unique minimizer of  $\min_{x_i \in \mathcal{D}} \|x_k^* - x_i\|^2$ , we have

$$\begin{aligned}
\lim_{k \rightarrow \infty} d_{\sigma_k}(x_k^*; \mathcal{D})^2 &= \min_i \lim_{k \rightarrow \infty} \|x_k^* - x_i\|^2 \\
&= \lim_{k \rightarrow \infty} \|x_k^* - x_j\|^2 \\
&= 0.
\end{aligned} \tag{22}$$

481 Hence,  $x_k^*$  can not be a local maximizer or saddle point of  $\min_x d_{\sigma_k}(x; \mathcal{D})^2$ , which raises contradic-  
482 tion. □

483 Since gradient descent converges to a local minimizer almost surely with random initialization [69]  
484 and appropriate step sizes, there is a unique  $x_j$  for  $x_k^*$  and (18) holds. We also note that a similar  
485 conclusion can be reached by using  $\Gamma$ -convergence of the softmin to min as  $\sigma_k \rightarrow 0$  [70].

## 486 A.2 Proof for Proposition 2

487 Let  $L_e$  be the local Lipschitz constant of the error  $e(x) := f(x) - f_\theta(x)$  over some domain  $\mathcal{Z} \subseteq \mathcal{X}$ ,  
 488 and define  $x_c := \arg \min_{x_i \in \mathcal{D}} \frac{1}{2} \|x - x_i\|_2^2$ , i.e., the closest data-point. Then, we have the following:

$$\begin{aligned}
 \|f(x) - f_\theta(x)\| &\leq \min_{x_i \in \mathcal{D}} [e(x_i) + L_e \|x - x_i\|_2] \\
 &\leq e(x_c) + L_e \|x - x_c\|_2 \\
 &= e(x_c) + \sqrt{2} L_e \sqrt{\frac{1}{2} \|x - x_c\|_2^2} \\
 &= e(x_c) + \sqrt{2} L_e \sqrt{\frac{1}{2} \min_{x_i \in \mathcal{D}} \|x - x_i\|_2^2} \\
 &= e(x_c) + \sqrt{2} L_e \sqrt{\min_{x_i \in \mathcal{D}} \frac{1}{2} \|x - x_i\|_2^2} \\
 &\leq e(x_c) + \sqrt{2} L_e \sqrt{-\sigma^2 \log \left( \sum_i \exp \left( -\frac{1}{2\sigma^2} \|x - x_i\|^2 \right) \right) + \sigma^2 \log N} \\
 &= e(x_c) + \sqrt{2} L_e \sqrt{d_\sigma(x; \mathcal{D})^2 + C_2}
 \end{aligned} \tag{23}$$

489 where  $C_2 := \sigma^2 \log N - C$ , and  $C$  is the constant defined in (4). In the second line, we use the  
 490 fact that as  $x_c$  is a feasible solution to the minimization in the first line, it is an upper bound on the  
 491 optimal value. In the sixth line, we have used the fact that for any vector  $v = [v_1, \dots, v_n]^\top \in \mathbb{R}^n$ ,  
 492  $\min\{v_1, \dots, v_n\} \leq -\frac{1}{t} \log \sum_{i=1}^n \exp(-tv_i) + \frac{\log n}{t}$  for some scaling  $t$ . In the final line, we have  
 493 applied the definition of  $d_\sigma(x; \mathcal{D})$  from (4).

## 494 A.3 Proof for Proposition 3

495 The perturbed data distribution can be written as a sum of Gaussians, since

$$\begin{aligned}
 p_\sigma(x') &:= \int \hat{p}(x) \mathcal{N}(x'; x, \sigma^2 \mathbf{I}) dx \\
 &= \int \left[ \frac{1}{N} \sum_i \delta(x_i) \right] \mathcal{N}(x'; x, \sigma^2 \mathbf{I}) dx \\
 &= \frac{1}{N} \sum_i \int \delta(x_i) \mathcal{N}(x'; x, \sigma^2 \mathbf{I}) \\
 &= \frac{1}{N} \sum_i \mathcal{N}(x_i; x, \sigma^2 \mathbf{I}) \\
 &= \frac{1}{N} \sum_i \mathcal{N}(x; x_i, \sigma^2 \mathbf{I})
 \end{aligned} \tag{24}$$

496 Then we consider the negative log of the perturbed data distribution multiplied by  $\sigma^2$ ,

$$\begin{aligned}
-\sigma^2 \log p_\sigma(x) &= -\sigma^2 \log \left[ \frac{1}{N} \sum_i \mathcal{N}(x; x_i, \sigma^2 \mathbf{I}) \right] \\
&= -\sigma^2 \log \left[ \sum_i \mathcal{N}(x; x_i, \sigma^2 \mathbf{I}) \right] + \log N \\
&= -\sigma^2 \log \left[ \frac{1}{\sqrt{(2\pi\sigma)^n}} \sum_i \exp \left[ -\frac{1}{2\sigma^2} \|x - x_i\|^2 \right] \right] + \sigma^2 \log N \\
&= -\sigma^2 \log \left[ \sum_i \exp \left[ -\frac{1}{2\sigma^2} \|x - x_i\|^2 \right] \right] + \sigma^2 \log N + \sigma^2 \frac{n}{2} \log(2\pi\sigma) \\
&= -\sigma^2 \text{LogSumExp}_i \left[ -\frac{1}{2\sigma^2} \|x - x_i\|^2 \right] + C(N, n, \Sigma) \\
&= \text{Softmin}_\sigma \left[ \frac{1}{2} \|x - x_i\|^2 \right] + C(N, n, \Sigma)
\end{aligned} \tag{25}$$

497 where we define  $C(N, n, \Sigma) := \sigma^2(\log N + n/2 \log(2\pi\sigma))$ .

## 498 B Details of the Planning algorithm

### 499 B.1 Computation of Gradients

500 Recall that the gradient of  $\log p_\sigma(x_i, u_i)$  cost w.r.t. the input variable  $u_j$  can be written as

$$\nabla_{u_j} \log p(x_i, u_i) = \nabla_{x_i} \log p(x_i, u_i) \mathbf{D}_{u_j} x_i + \nabla_{u_i} \log p(x_i, u_i) \mathbf{D}_{u_j} u_i \tag{26}$$

501 where  $\mathbf{D}$  denotes the Jacobian. Writing the dependence on each variable more explicitly, we have

$$\nabla_{u_j} \log p(x_i(u_j), u_i(u_j)) = \nabla_{x_i} \log p(x_i(u_j), u_i(u_j)) \mathbf{D}_{u_j} x_i(u_j) \tag{27}$$

$$+ \nabla_{u_i} \log p(x_i(u_j), u_i(u_j)) \mathbf{D}_{u_j} u_i(u_j) \tag{28}$$

502 where we note that  $\mathbf{D}_{u_j} u_i = 1$  if  $i = j$  and 0 otherwise. As long as  $i > j$ , we also note that  $x_i$   
503 has a dependence on  $u_j$ . Instead of computing this gradient explicitly, we first rollout the trajectory  
504 to compute  $x_i(u_j)$ ,  $u_i(u_j)$ , and compute the score function. Then we ask: which quantity do we  
505 need such that it gives us the above expression when differentiated w.r.t.  $u_j$ ? We use the following  
506 quantity,

$$c_{ij} = s_x(x_i, u_i) x_i(u_j) + s_u(x_i, u_i) u_i(u_j) \tag{29}$$

507 where the score terms have been detached from the computation graph. Note that  $c_{ij}$  is a scalar and  
508 allows us to use reverse-mode automatic differentiation tools such as `pytorch` [71].

### 509 B.2 Noise-Annealing During Optimization

510 Additionally, we anneal the noise level during iterations of Adam. Given a sequence  $\sigma_k$  with  $K$  being  
511 the total number of annealing steps, we run Adam for  $\text{max\_iter}_{\text{max}}/K$  iterations, then run it with the  
512 next noise level.

### 513 B.3 Connection to Diffuser

514 We first lift the dynamics constraint into a quadratic penalty and write the penalty as  $\log p(x_{t+1}|x_t, u_t)$ .  
515 This equivalence is seen by considering a case where we fix  $x_t, u_t$  and perturb  $x_{t+1}$  with a Gaussian  
516 noise of scale  $\sigma$ . If  $(x_t, u_t, x_{t+1})$  is in the dataset, it obeys  $x_{t+1} = f(x_t, u_t)$  under real-world  
517 dynamics  $f$ . This allows us to write

$$\begin{aligned}
p_\sigma(x_{t+1}|x_t, u_t) &= \mathcal{N}(x_{t+1}|f(x_t, u_t), \sigma^2 \mathbf{I}) \\
\log p_\sigma(x_{t+1}|x_t, u_t) &= -\frac{1}{2} \|x_{t+1} - f(x_t, u_t)\|^2 + C
\end{aligned} \tag{30}$$

where  $C$  is some constant that does not effect the objective. Then, we rewrite our objective using the factoring  $p(x_t, u_t) = p(u_t|x)p(x_t)$ . This allows us to rewrite the objective of Equation (11) as

$$\begin{aligned} & \sum_{t=1}^T r_t(x_t, u_t) + \beta \sum_{t=1}^T \log p(u_t|x_t) + \beta \sum_{t=1}^T \log p(x_t) + \beta \sum_{t=1}^T \log p(x_{t+1}|x_t, u_t) \\ & = V(x_{1:T}, u_{1:T}) + \beta \log p(x_{1:T}, u_{1:T}) + \sum_{t=1}^T \log p(x), \end{aligned} \quad (31)$$

where the first two terms are the objectives in Diffuser [25].

## B.4 First-Order Policy Search

We note that our original method for gradient computation can easily be extended to the setting of feedback first-order policy search, where we define the uncertainty-penalized value function as

$$\begin{aligned} & \max_{\alpha} \quad \mathbb{E}_{x_1 \sim \rho} \left[ \sum_{t=1}^T r_t(x_t, u_t) + \beta \sigma^2 \sum_{t=1}^T \log p_{\sigma}(x_t, u_t; \mathcal{D}) \right] \\ & \text{s.t.} \quad x_{t+1} = f_{\theta}(x_t, u_t), u_t = \pi_{\alpha}(x_t) \quad \forall t \in [1, T], \end{aligned} \quad (32)$$

where  $\rho$  is some distribution of initial conditions. We rewrite the objective with an explicit dependence on  $\alpha$ , and use a Monte-Carlo estimator for the gradient of the stochastic objective,

$$\begin{aligned} & \nabla_{\alpha} \mathbb{E}_{x_1 \sim \rho} \left[ \sum_{t=1}^T r_t(x_t(\alpha), u_t(\alpha)) + \beta \sigma^2 \sum_{t=1}^T \log p_{\sigma}(x_t(\alpha), u_t(\alpha); \mathcal{D}) \right] \\ & = \mathbb{E}_{x_1 \sim \rho} \nabla_{\alpha} \left[ \sum_{t=1}^T r_t(x_t(\alpha), u_t(\alpha)) + \beta \sigma^2 \sum_{t=1}^T \log p_{\sigma}(x_t(\alpha), u_t(\alpha); \mathcal{D}) \right] \\ & \approx \frac{1}{N} \sum_{i=1}^N \nabla_{\alpha} \left[ \sum_{t=1}^T r_t(x_t(\alpha), u_t(\alpha)) + \beta \sigma^2 \sum_{t=1}^T \log p_{\sigma}(x_t(\alpha), u_t(\alpha); \mathcal{D}) \right] \quad \text{s.t.} \quad x_1 = x_i \sim \rho \end{aligned} \quad (33)$$

where the last equation denotes that fixing the initial condition to  $x_i$  sampled from  $\rho$ , and  $N$  is the number of samples in the Monte-Carlo process. Since  $r_t$  and  $f_{\theta}$  are differentiable, we can obtain the gradient

$$\nabla_{\alpha} \sum_{t=0}^T r_t(x_t(\alpha), u_t(\alpha)) \quad (34)$$

after rolling out the closed-loop system starting from  $x_i$  and using automatic differentiation w.r.t. policy parameters  $\alpha$ . To compute the gradient w.r.t. the score function, we similarly use the chain rule,

and differentiate it w.r.t  $\alpha$ , which lets us compute

$$\begin{aligned} \frac{\partial}{\partial \alpha} \left[ \sum_{t=1}^T \log p_{\sigma}(x_t, u_t) \right] &= \sum_{t=1}^T \frac{\partial}{\partial \alpha} \log p_{\sigma}(x_t(\alpha), u_t(\alpha)) \\ &= \sum_{t=1}^T \frac{\partial}{\partial x_t} \log p_{\sigma}(x_t, u_t) \frac{\partial x_t}{\partial \alpha} + \frac{\partial}{\partial u_t} \log p_{\sigma}(x_t, u_t) \frac{\partial u_t}{\partial \alpha} \\ &= \sum_{t=1}^T s_x(x_t, u_t; \sigma) \frac{\partial x_t}{\partial \alpha} + s_u(x_t, u_t; \sigma) \frac{\partial u_t}{\partial \alpha} \end{aligned} \quad (35)$$

where the last term is obtained by differentiating

$$\sum_{t=1}^T s_x(x_t, u_t; \sigma) x_t + s_u(x_t, u_t; \sigma) u_t \quad (36)$$

after detaching  $s_x$  and  $s_u$  from the computation graph.

## B.5 Imitation Learning

We give more intuition for why maximizing the state-action likelihood leads to imitation learning. If the empirical data comes from an expert demonstrator, maximizing data likelihood leads to minimization of cross entropy between the state-action pairs encountered during planning and the state-action occupation measure of the demonstration policy, which is estimated with the perturbed empirical distribution  $p_\sigma(x_t, u_t)$ ,

$$\sum_t \log p_\sigma(x_t, u_t) = \sum_t \log p_\sigma(u_t|x_t) + \sum_t \log p_\sigma(x). \quad (37)$$

Note that the  $\log p_\sigma(u_t|x_t)$  is identical to the Behavior Cloning (BC) objective, while  $\log p_\sigma(x_t)$  drives future states of the plan closer to states in the dataset. We note that Adversarial Inverse Reinforcement Learning (AIRL) [34] minimizes a similar objective as ours [12].

## C Experiment Details

### C.1 Cartpole with Learned Dynamics

**Environment.** We use the cart-pole dynamics model in [58, chapter 3.2], with the cost function being

$$c_t(x_t, u_t) = \begin{cases} \|x_t - x_g\|_{\mathbf{Q}}^2 & \text{if } t = T \\ 0 & \text{else.} \end{cases} \quad (38)$$

$\mathbf{Q} = \text{diag}(1, 1, 0.1, 0.1)$ . We choose the planning horizon  $T = 60$ .

**Training.** We randomly collected a dataset of size  $N = 1,000,000$  within the red box region in the state space. The dynamics model is an MLP with 3 hidden layers of width (64, 64, 32). For ensemble approach we use 6 different dynamics models, all with the same network structures.

We train a score function estimator, represented by an MLP with 4 hidden layers of width 1024. The network is trained for 400 epochs with a batch size of 2048.

**Parameters** During motion planning, for Adam optimizer we use a learning rate of 0.01. For CEM approach we use a population size of 10, with standard variance  $\sigma = 0.05$ , and we take the top 4 seeds to update the mean in the next iteration.

**Data Distance Estimator.** To train a data distance estimator, we introduce a function approximator  $d_\eta : \mathbb{R}^n \times \mathbb{R}_+ \rightarrow \mathbb{R}$  parametrized by  $\eta$  to predict the noise-dependent Softmin distance. The training objective is given by

$$\min_\eta \frac{1}{2} \mathbb{E}_{x \in \Omega, \sigma \in [0, \sigma_{max}]} \left[ \frac{1}{\sigma^2} \left| d(x, \sigma) - \text{Softmin}_{x_i \in \mathcal{D}} \frac{1}{2} \|x - x_i\|_{\sigma^{-2}\mathbf{I}}^2 \right| \right] \quad (39)$$

where  $\Omega$  is a large enough domain that covers the data distribution  $\mathcal{D}$ . For small datasets, it is possible to loop through all  $x_i$  in the dataset to compute this loss at every iteration. However, this training can get prohibitive as all of the training set needs to be considered to compute the loss, preventing batch training out of the training set.

### C.2 D4RL Dataset

**Environment.** We directly use the D4RL dataset [43] Mujoco tasks [60] with 3 different environments of halfcheetah, walker2d, and hopper. We additionally use differnet sources of data with random, medium, and medium-expert.

**Training.** The dynamics and the score functions are both parametrized with MLP with 4 hidden layers of width 1024. The noise-conditioned score function is implemented by treating each level

of noise  $\sigma_k$  as an integer token, that gets embedded into a 1024 vector and gets multiplied with the output of each layer. This acts similar to a masking of the weights depending on the level of noise. The D4RL environment does not provide us with a differentiable reward function, so we additionally train an estimator for the reward. We empirically saw that for score function estimation, wide shallow networks performed better. We train both instances for 1000 iterations with Adam, with a learning rate of  $1e-3$  and batch size of 2048.

We additionally set a noise schedule to be a cosine schedule that anneals from  $\sigma = 0.2$  to  $\sigma = 0.01$  for 10 steps in the normalized space of  $x, u$ .

**Parameters** We used a range of  $\beta$ s between  $1e^{-3}$  and  $1e^{-1}$  depending on the environment, where in some cases it helped to be more reliant on reward, and in others it’s desirable to rely on imitation. We use a MPC with  $T = 5$  and optimize it for 50 iterations with an aggressive learning rate of  $1e^{-1}$ .

### C.3 Pixel Single Integrator

**Environment.** In this environment, we have a 2D single integrator  $f(x_t, u_t) = x_t + u_t$ ,  $x_t \in \mathbb{R}^2, u_t \in \mathbb{R}^2$  as the underlying ground-truth dynamics; however, instead of raw states  $x_t$ , we observe a  $32 \times 32$  grayscale image  $y_t = h(x_t) \in \mathbb{R}^{32 \times 32}$ , which are top-down renderings of the robot. In these observations, the position of the robot is represented with a dot. Moreover, we assume that we do not directly assign the 2D control input  $u_t$ , but instead propose a  $32 \times 32$  grayscale image  $\hat{u}_t$ , where the value of the 2D control action  $u_t$  is extracted from the image via a spatial average:

$$u_t = \sum_{(p_x, p_y)} g_u(p_x, p_y) \hat{u}_t(p_x, p_y), \quad (40)$$

where the sum loops over each pixel  $(p_x, p_y) \in \{1, \dots, 32\}^2$ ,  $y_t(p_x, p_y)$  refers to the intensity of the image at pixel  $(p_x, p_y)$ , and  $g_u : \mathbb{Z} \times \mathbb{Z} \rightarrow \mathbb{R}^2$  is a grid function mapping from pixel  $(p_x, p_y)$  to a corresponding control action. The control image  $\hat{u}_t$  is normalized such that its overall intensity sums to 1. Given some goal  $x_g$ , the reward is set to be the  $-c_t(x_t, u_t)$ , where the cost  $c_t(x_t, u_t)$  is

$$c_t(x_t, u_t) = \begin{cases} \|x_t - x_g\|_{\mathbf{Q}_t}^2 + \|u_t\|_{\mathbf{R}}^2 & \text{if } t = T \\ \|x_t - x_g\|_{\mathbf{Q}}^2 + \|u_t\|_{\mathbf{R}}^2 & \text{else,} \end{cases} \quad (41)$$

To evaluate this cost function for the planned sequence of image observations and control images, the states  $x_t$  are also extracted from the image observations through a similar spatial averaging:

$$x_t = \sum_{(p_x, p_y)} g_{\text{im}}(p_x, p_y) y_t(p_x, p_y), \quad (42)$$

where  $g_{\text{im}} : \mathbb{Z} \times \mathbb{Z} \rightarrow \mathbb{R}^2$  is a grid function mapping from pixel  $(p_x, p_y)$  to a corresponding state.

In other words, we have running costs for the state and input, and a different terminal cost for the state. We set  $\mathbf{R} = 6.5\mathbf{I}$ ,  $\mathbf{Q} = 500\mathbf{I}$ , and  $\mathbf{Q}_d = 1000\mathbf{I}$ , and plan with a horizon of  $T = 15$ .

**Training.** We collect a randomly collected dataset of size  $N = 200,000$ , with underlying 2D data sampled from  $x_t \in [-1, 1]^2$  and  $u_t \in [-0.2, 0.2]^2$ . Both the dynamics and the score function estimator are represented as U-Nets [72], with the architecture coming from [73].

**Parameters.** We found that  $\beta = 0.5$  is sufficient for the penalty parameter. Results are obtained within 1450 iterations with a learning rate of 0.03. In representing the noise-conditioned score function, we use 232 smoothing parameters  $\{\sigma_k\}_{k=1}^{232}$ , from  $\sigma_1 = 50$  to  $\sigma_{232} = 0.01$ .

**Baselines.** For gradient-based planning with ensembles, we set  $\beta = 0.5$  and use an ensemble of size 10. For CEM with ensembles, we set  $\beta = 0.5$ , with an ensemble of size 5 (we only used the first five networks in the original ensemble of size 10 due to RAM limitations).

## 606 C.4 Box Pushing with Marker Dynamics

607 **Environment.** We prepare a box-pushing environment where we assume that the box follows  
 608 quasistatic dynamics, which allows us to treat the marker positions directly as state of the box that is  
 609 bijective with its pose. We use 2D coordinates for each markers, and append the pusher position, also  
 610 in 2D, resulting in  $x_t \in \mathbb{R}^{12}$ . The pusher is given a relative position command with a relatively large  
 611 step size [68]. In addition, we give the robot knowledge of the pusher dynamics,  $x_{t+1}^{\text{pusher}} = x_t^{\text{pusher}} + u_t$ .  
 612 The general goal of the task is to push the box and align the edge of the box with the blue tape line.

613 We formulate our cost as

$$c_t(x_t, u_t) = \begin{cases} \|x_t^{\text{marker}} - x_g^{\text{marker}}\|_{\mathbf{Q}_T}^2 & \text{if } t = T \\ \|u_t\|_{\mathbf{R}}^2 & \text{else,} \end{cases} \quad (43)$$

614 where  $\mathbf{Q}_T = \mathbf{I}$  and  $\mathbf{R} = 0.1\mathbf{I}$ . In order to get  $x_g^{\text{marker}}$ , we place the box where we want the goal to be  
 615 and measure the position of the markers.

616 **Training.** We collect 100 demonstration trajectories resulting in 750 pairs of  $(x_t, u_t, x_{t+1})$ . The  
 617 dynamics and the score functions are learned with a MLP of 4 hidden layers with size 1024, with the  
 618 noise-conditioned score estimator being trained similar to the D4RL dataset with multiplicative token  
 619 embeddings. We train for 500 iterations with a batch size of 32.

620 We additionally set a noise schedule to be a cosine schedule that anneals from  $\sigma = 0.2$  to  $\sigma = 0.01$   
 621 for 10 steps.

622 **Parameters.** We observed that  $\beta = 1e^{-2}$  performs well for all the examples, with a learning rate  
 623 of 0.1 and 50 iterations. We found that a horizon of  $T = 4$  was sufficient for our setup.
